# Supplementary material for: Differential Effects of Dabigatran and Warfarin on Bone Volume and Structure in Rats with Normal Renal Function
Source: PLoS One. 2015 Aug 4;10(8):e0133847. doi: 10.1371/journal.pone.0133847 (PMC4524674; doi:10.1371/journal.pone.0133847)
Supplement: S2 Dataset — (XLS) [file pone.0133847.s002.xls]

## Sheet: Sheet1
ONEWAY BVTV TbTh TbN TbSep OTh OSBS ESBS NOcTV NdNTV NdNTmN MAR sLSBS dLSBS MSBS BFRBS AcF ObSBS MSV FD BY gruppo
/STATISTICS DESCRIPTIVES
/MISSING ANALYSIS.
Oneway
[DataSet1] G:\revisione II Plos one\analisi femore ratti War_Dab.sav
Descriptives
		N	Mean	Std. Deviation	Std. Error	95% Confidence Interval for Mean		Minimum	Maximum
						Lower Bound	Upper Bound
BVTV	1	150	42.4432	6.15239	1.94556	38.042	46.8443	33.8467	53.54
	2	105	28.3813	5.0815	1.79658	24.133	32.6295	21.98	37.95
	3	150	46.691	3.73252	1.18033	44.0209	49.3611	39.67	51.78
	Total	405	39.9426	9.09632	1.71904	36.4154	43.4697	21.98	53.54
TbTh	1	150	83.2375	10.3026	3.25798	75.8674	90.6076	63.7	98.79
	2	105	58.0038	19.4875	6.88989	41.7118	74.2957	45.44	91.33
	3	150	75.99	12.9423	4.09272	66.7316	85.2484	57.51	96.69
	Total	405	73.4395	17.2695	3.26362	66.7431	80.1359	45.44	98.79
TbN	1	150	4.42633	1.46411	0.462993	3.37897	5.4737	3.07	7.16
	2	105	3.83438	1.13424	0.401016	2.88612	4.78263	2.18	5.755
	3	150	4.743	1.35994	0.430049	3.77016	5.71584	3.21	7.39
	Total	405	4.3703	1.34248	0.253706	3.84974	4.89086	2.18	7.39
TbSep	1	150	111.736	33.9741	10.7436	87.432	136.039	63.43	166.29
	2	105	217.438	35.2062	12.4473	188.005	246.871	191.8	293.52
	3	150	129.44	23.1093	7.3078	112.909	145.971	99.6	174.45
	Total	405	148.259	54.1047	10.2248	127.28	169.239	63.43	293.52
OTh	1	150	8.734	1.82538	0.577235	7.4282	10.0398	6.44	11.63
	2	105	9.3875	1.46701	0.518665	8.16105	10.6139	7.06	11.2
	3	150	8.391	2.23456	0.706631	6.79249	9.98951	4.01	11.02
	Total	405	8.79821	1.87053	0.353497	8.0729	9.52353	4.01	11.63
OSBS	1	150	2.8084	1.34217	0.424431	1.84827	3.76853	0.783	4.82
	2	105	4.1825	0.818915	0.28953	3.49787	4.86713	3.48	5.86
	3	150	3.12	1.75186	0.553986	1.8668	4.3732	1.02	4.97
	Total	405	3.31229	1.45926	0.275775	2.74644	3.87813	0.783	5.86
ESBS	1	150	1.051	0.679942	0.215017	0.564599	1.5374	0.36	2.7
	2	105	2.3625	0.78016	0.275828	1.71027	3.01473	0.79	3.24
	3	150	1.594	0.418946	0.132482	1.2943	1.8937	0.75	2.07
	Total	405	1.61964	0.808654	0.152821	1.30608	1.93321	0.36	3.24
NOcTV	1	150	1.717	0.599371	0.189538	1.28824	2.14576	1.23	3.14
	2	105	1.08	0.209421	0.0740415	0.90492	1.25508	0.89	1.43
	3	150	2.08	1.35715	0.429167	1.10916	3.05084	0.78	4.69
	Total	405	1.66464	0.954597	0.180402	1.29449	2.0348	0.78	4.69
NdNTV	1	150	8.39595	6.04145	1.91047	4.07416	12.7177	2.09589	18.2883
	2	105	5.79232	2.00006	0.707128	4.12023	7.46441	3.35477	8.72365
	3	150	10.7451	6.30498	1.99381	6.23481	15.2554	5.73	23.5823
	Total	405	8.49104	5.52245	1.04365	6.34966	10.6324	2.09589	23.5823
NdNTmN	1	150	0.710267	0.224241	0.0709111	0.549854	0.870679	0.43	1.11429
	2	105	0.380421	0.0972877	0.0343964	0.299087	0.461756	0.196667	0.488829
	3	150	0.610267	0.317001	0.100244	0.383498	0.837035	0.152941	1.11429
	Total	405	0.580311	0.266717	0.0504047	0.476889	0.683733	0.152941	1.11429
MAR	1	150	0.3928	0.137899	0.0436075	0.294153	0.491447	0.21	0.58
	2	105	0.38948	0.103413	0.036562	0.303025	0.475935	0.26584	0.54
	3	150	0.404343	0.128731	0.0407084	0.312254	0.496432	0.244	0.588
	Total	405	0.395974	0.12115	0.0228952	0.348997	0.442951	0.21	0.588
sLSBS	1	150	2.71691	1.06874	0.337966	1.95238	3.48144	1.31954	4.14012
	2	105	4.12161	1.12693	0.398429	3.17947	5.06374	2.56282	5.41924
	3	150	2.46148	1.08213	0.342198	1.68738	3.23559	0.645544	4.11006
	Total	405	3.02703	1.26862	0.239746	2.53511	3.51895	0.645544	5.41924
dLSBS	1	150	2.11684	1.12235	0.354917	1.31396	2.91972	0.71954	3.73648
	2	105	3.51911	1.14969	0.406476	2.55794	4.48027	1.89282	4.91924
	3	150	1.85148	1.06553	0.336951	1.08925	2.61372	0.045544	3.41006
	Total	405	2.42272	1.28557	0.242951	1.92422	2.92121	0.045544	4.91924
MSBS	1	150	3.47536	1.60311	0.506948	2.32856	4.62216	1.37931	5.61018
	2	105	5.58241	1.69039	0.597643	4.16921	6.99561	3.24423	7.52886
	3	150	3.17723	1.47004	0.464868	2.12562	4.22883	1.36832	5.56509
	Total	405	3.9709	1.84703	0.349056	3.25469	4.6871	1.36832	7.52886
BFRBS	1	150	0.0121909	0.00377191	0.00119278	0.00949264	0.0148892	0.008	0.019
	2	105	0.0203009	0.00233601	0.000825906	0.0183479	0.0222538	0.01687	0.0240133
	3	150	0.0120289	0.00659418	0.00208526	0.00731172	0.0167461	0.0014217	0.0221872
	Total	405	0.0144502	0.00590388	0.00111573	0.0121609	0.0167395	0.0014217	0.0240133
AcF	1	150	0.155245	0.04142	0.0130981	0.125615	0.184875	0.103546	0.222646
	2	105	0.276876	0.0288605	0.0102037	0.252748	0.301004	0.241932	0.319535
	3	150	0.154852	0.0866509	0.0274014	0.0928654	0.216838	0.0199585	0.291097
	Total	405	0.189856	0.0801985	0.0151561	0.158758	0.220954	0.0199585	0.319535
ObSBS	1	150	0.759	0.336698	0.106473	0.518141	0.999859	0.31	1.21
	2	105	0.865	0.281273	0.0994449	0.62985	1.10015	0.56	1.45
	3	150	0.742	0.313007	0.0989815	0.518088	0.965912	0.24	1.34
	Total	405	0.783214	0.306244	0.0578747	0.664465	0.901963	0.24	1.45
MSV	1	150	0.0193333	0.026888	0.00850272	9.88378e-05	0.0385678	0	0.09
	2	105	0.0695	0.0854634	0.0302159	-0.00194923	0.140949	0.006	0.21
	3	150	0.0602	0.0671082	0.0212215	0.0121937	0.108206	0.006	0.15
	Total	405	0.0482619	0.0642819	0.0121481	0.023336	0.0731878	0	0.21
FD	1	150	1.58	0.0917727	0.0290211	1.51435	1.64565	1.47	1.73
	2	105	1.53875	0.156793	0.0554346	1.40767	1.66983	1.24	1.73
	3	150	1.489	0.100824	0.0318835	1.41687	1.56113	1.35	1.64
	Total	405	1.53571	0.118772	0.0224459	1.48966	1.58177	1.24	1.73
	1: Dabigatran
	2: Warfarin
	3: Controls
